# Supplementary material for: Genetic predisposition for increased red blood cell distribution width is an early risk factor for cardiovascular and renal comorbidities
Source: PubMed Central journal article supplement (PMC7325433; doi:10.1242/dmm.044081), 2020-05-18
Supplement: dmm-13-044081-s1.pdf [file dmm-13-044081-s1.pdf]

## Rffl-Inc1 Isoform – 1

GAGGUUCUAGGUGUUUGGGUACUAGAUCGAGGCGUGUAGUAGUCCACUAUGGGAUUUGGGAUGUUAGAGGUUUUUUUUUUCUU  
UUUAACCAAAGAAACCAUUCAGGAAGCCACAGGCCUCCACCAACUGCUAAUUUUUGAAUCCUGAGGGCUUUUCUACAGCUGAAGGA  
GACAUUAGCAAUAGUGGAGUCCCGCCUCCUAAUUUCCAGAUGAGGAGACAGACCUGUAAGAAACAUAUAAUGGCUUUGUCCAUA  
AGCCAAGCUAUUGUGCCAGUGUUUACUCCUGACACUGAAUGCGCCUGGGGAACUCCAGCACUUGGAAAGCCAUGGAGUUAGGCC  
AUAGGCCAGACCUGCGUGAGGGCGUCAGGCCUGUCACAUGGAUGAGGCCGUGCAGUGCUAACAGGAGCUGCUGGGGUGGUGGCA  
GGUUUGGUUCAGGGCAGUGUGUACCACAGGACCCUUUGAAUUAUUCUCAGACACUUUUCUGGAGAACUGUUUUUGGGGACCAGCUG  
UCAGAAAUCGUCUGCAUUUGAGUGGGGGGCAAGGUUUAAUUAUAAAACAUUCCAACUUCUGCGGCUCUUUUUUUUUUUUUUUU  
CCCAGCCUUCUACUCCACGUUUUGUUUUUGGACUCCUUUCCUAAUUUCAGACCAAUUGGUACAUUUUUAAUUGCUCAUUGCAGG  
GCAGAUUGGUAGCACAAGGCAUGGGAAAUCAGAAAUGUCUUAAGAAGUCCGUGACUGUUAUGAGUGCUUCCAGGCAGAUUCUCAA  
CUUUAAAUGAAUAGAUUUUCCCGUCCAGUGAGCCAGUUGUCAGAAACUAUGAAAAGUACCCUGUUUGUCCAAGGUCUAAUUCUG  
AGCUGGAGAGCUGUCAGACAACCUUGGACAGGAAGUUGGGUUAAGCAGAAUGUGCUUUGCUUACUGCAGCCUGGGUGUCUGCAG  
UUUGAAACUUGCUGCGGGUAAAAGUCAAGACUUAACAGAUUGUGGUGGCACACCUGUAUUUUAUUCAGCAUCCAGGAGGCGG  
AGGGAGGAAUUCUUGGAGGCCAAGACUUUAAUAUCGAAAUGUUGUCCUGUGUGAGAGGGAGGUAUACAGUAGCCAUUCAUA  
CACAGGAGUUUUUCCAGUGCUGUGACCCGUGCCUGACACACAGCAGUUUJAGGGGAGAAAACUUUUGGUUUUCUUCUUGUCUU  
UUGGCUUACAGUUUGGUAUACGUCUGCCUUGACAGGAAGUGCUUGGUUCGAGGAACGUACCUAGUCGUUUUGCAUCUGCAG  
UAUAAGGAAGCAAAGAGUAAGACCAGUAGGGCUUGGCUAUGACUUAAGGCAAGCCAGAGCGCUGACUUCUUUGGAGGCUCC  
AUCUUCUUUAGUUUCACAGCCUCCAAAACAGCCAUCAUCUGGGGACACUAGAGCCUUAUGGGGACAUUUCAUGUUAACACAAAA  
CAGCUGUUGCCUCUCUGUACAUAAGCAGCUUUUCUUCUGAGACCAGGUCAUUCUUGGAGUCACAGGCAUGGUGUUUCCUGA  
GUUCUACAAUGUUGCAGUUUAUAAACCGAAAGGGCACUGAGCGGACUGCUGCGGCCUGCUACUUUUGGUAGGUGUGAGAUUCAGU  
CUGUGCUAGCUCUUUUUJAAAAUACAAUAGGGAUUUUJAGCAUAGAUAUACACAGCCUUGAGUAACAGGUUCCUUUGUGAGG  
CUCCAGGAUUCUAGCACCUUCUAGUGUGUUUUGACCAAGGUAGUUUACAAGUACUGUGAGUCUUUGAGAAGGUUUUUCAUGU  
UUGAAUUJAGAGUUUCUUGCAUACUGGAGGUUGGAUCUAAUUCUGGUCUCCUACUUCGCCCCCACCACCCCCAGUCUCUGGA  
GAAGCUAUJAAUAAGUAAUUGCCUUGGGGUCACUCAGCUGGUAACAAUUCGACAGCCCUUUUUCUJAGCCCUACUCCUUU  
UUCAUUGCUUCCUGCUGUGAAAUUGCUUCAUUGCCUUAUJAGGGGACCAGAUUGGCUUGGGGAUAGCCACCUUGCAGGGAGUCACC  
UUGGAUCUUUGUGGAUUUAUJAAAACUGCUUGGGUUAUUUCAAACUGGUCCAUCUGCUGUCCUGGGCUAAUUAJAGGAGCAGA  
UAAAGGUUUUCUUUAGAUUAUCAUUGUCUAAGAAUACAUUUUUAUUGUCCUUGUCCUAAUUCACUGGGAUUGGGGCUACUAA  
AGCAGGCACCUCCUGAGCAAAGUCCCAUGAACACCCUGAAACCAUCAUUUCCUUUGUUUCAGCGUAGAAUUGUCUGGGAAUACUU  
AGGUUACGGUGACAGCCUJAGGUCACUGAACUACCCGUGCCUUCUUGUGCAGAGUACGCUUGGUUCAGUAUAUUGAACUGAGC  
AUGCCAGAGCACCUUGUCUCCUJAGGUAAAAGUCUUGAUUACAUCUUUUUUCUUGCAUUCAGUAUCCAGCCAAAGAAGUCUJAGG  
GGGUGGGAGGUGAGUGUUGGGUCGGUGCUGGGCUGGCUUUGCAAUCAGAGAGGACAGUACUCCUGAAAUAAGCACCAGGGUCG  
AUGUUUAUCAAGGAUGUGAAUJAGGAACUGUUUUGUAUCUUGUCUGGGGAUAGUGACAAGUAUAUUGAGGGGCCAGUUUAAGCAC  
AGGCGUUUCUUGGUJAGGGGAGAAUJAGGUUAUAUCACAGAGGAGGGAGGGUGGUUGUUGGUGUUGGUUUUUUUUGGUGUAC  
UAGCAGACUAGAAUUUUUCUUUUGCUUUUJGGGCGGUUUUCUGGGCAUGCCACUUCUGGCAGGAGCAGAAUUUCUGCAGAAAGU  
CAGCAUAAUUUUUJAGAUUUGAUAAAACAUCAGAGCAAGCUAAAAGUUGGGAGGAAGAAAGUGCUUGGUCCGAAUUUCUCCUUUAUC  
ACUGACUUGCAUCCAGCUGCGGUJAGGUGCUGCUGUCACACCCCAACCCCAACCCCAACCCCAAGGCCAGCCAGCGAUGAGAAUGCUAUU  
CUACCCCGACCUGGUJAGAGAAGCACAGAGAGGAGACCGGAAACUUAACGCAUUGGAGUAGAAAGGGGAAGUAAUUGCACAGCC  
UAGCCUGCGGGAGGACAACCAUUGGGCAGCUCGGGAAGAUUCUUAAGGGGUUCCACACUCAUUUJAGAGCCAGUGGAAAAGGCCA  
CUAAGAUCAUUGAGCCUUUUGGUJAGAACUAGAUUGAACUGGAUUAAAGGUUUUGGCUUGUCUAAUGGAGGUAAACAACAACCC  
AAAACAAGACGGGAUCUUUGUCUUAUAAAACCUUCAAAGCCAGGUGUGUUAUCUGGUGAGGUGGGAGGGUUGCUUGAGUCCGGG  
AGUUCAAGAUUAGCCUCAGAAACAUGAUUUCAGCUGGAAAACAGAAGUAAAACCUUUAAAACAACAACAAAAA  
AAAAAAAAA

## Rffl-Inc1 Isoform – 2

GUCCUUUCCUUUCCGAGAUGCUUGCCGUGAUCUCCUCUUGCACUGACUCACAUCUUGUCUUCGUUCCUUUUCUACCCAGAUUUU  
GCCUGAUUCUUUUCUCCAUUAACAGUCACUGUGGGUGUCCUGCCUGCUACUCACCUCGCCAUUCCCAACCAUCCACGAGUCA  
UAUAAUJAGCAUGGGAGCCAAGUGUGAUCACAUUAAAAACCUAAUJAGAAAGACCGUAUAUGGAGAACAGUCCUUUAGGUUCAUCAG  
UGGUUUUCUUUCAAGCAGGAUUAUUUCUGACCGGAGUUGAAAGGGAAGAGGAGGUUCUAGGUGUUUGGGUACUAGAUCGAGGCGU  
GUAGUAGUCCACUAUUGGGAUAUGGGAUGUJAGAGGUUUUUUUUUUUUUUUAACCAAAGAAACCAUUCAGGAAGCCACAGGCCUU  
CCACCAACUGCUAAUUUUGAAUCCUGAGGGCUUUUCUACAGCUGAAGGAGACAUUAGCAAUJAGUGGAGUCCCGCCUUCUAAUUU  
CCAGAUAGGAGACAGACCUGUAAGAAACAUAAAUGGCUUUGUCAUAAAAGCCAAGCUAUUGUGCCAGUGUUUACUCCUGACACU  
GAAUGUCGCCUGGGGAACUCCAGCACUUGGAAAGCCAUGGAGUJAGGCCAUJAGGCCAGACCUGCGUGAGGGGCGUCAGGCCUGAC  
AUGGAUGAGGCCGUGCAGUGCUAACAGGAGCUGCUGGGGUGGUGGCAGGUUUGGUUCAGGGCAGUGUGUACCACAGGACCCUUU  
GAAUUAUUCAGACACUUUUCUGGAGAACUGUUCUUUGGGGACCAGCUGUCAGAAUUCGUCUGCAUUUJAGUGGGGGGCAAGGUU  
UAUUUAUAAAACAUUCCAACUUCUGCGGCUCUUUUUUUUUUUUUUUUUCCAGCCUUCUACUCCAGUUUUGUUUUGGACUCCU  
UUCCUAAUUUCAGACCAAUUGGUJACAUUUUUUAUJGCUCAUJGACAGGCAGAUJGUAJGACAAGGCAUJGGGAAAUCCAGAAAAU  
UCUUAGAAGUCCGUGACUGUUAUGAGUGCUUGCCAGGCAGAUUCUUAACUUUAAUJAGUAAUJAGAUUUUCCCGUCCAGUGAGCCAG  
UUGUCAGAAACUAUGAAAAGUACCUUGUUUGUCAAGGUCUAUUUCUGAGCUGGAGAGCUGUCAGACAACCUUGGACAGGAAGUUG  
GGUUCAGCAGAAUGUGCUUUCACUUCGAGCCUGGGUGUCUGCAGUUUGAAACUUCGUCGCGGGUAAAAGUCAAGACUUAAC  
CAGAUJGGUGGUGCAGACCUUGAAUUAUUUCAGCAUCCAGGAGGCGGAGGGAGGAUAUCUUGGAGGCCAAGACUUUAAUUAUCG  
AAUUGUUGUCCUGUGAGAGGGAGGUAAUACAGUJAGCCAUJCAUJACACAGGAGUUUCUUUCCAGUUCUGUGACCCGUGCCUG  
ACACACAGCAGUUUJAGGGGAGAAAAACUUUUGGUUUUCUUCUUGUCUUUUGGCUUACAGUUUUGGAUJACGUGUCUGCCUUGAC  
AGGAAGUUCUJGGUUCGAGGAACGUACCUJAGUCGUUUJGCAUCUGCAGUAAUJAGGAAGCAAAGAGUJAGACCAGUJAGGGCUUGGC  
UAUGACUUAAGGCAAGCCAGAGCGCUGACUUCUUUUGGAGGCUCAUCUUCUUUAAAGUUUCACAGCCUUCCAAACAGCCAUCA  
UCUGGGGACAUJAGAGCCUJAGGGGACAUUJCAUGUUAACCAACAAAACAGCUGUUGCCUCUCUGUJACAUJAGCAGCUUUUCUUCU  
GAGACCCAGGCUAUUCUJUGGAGUCACAGGCAUJGGUJUUUCCUGAGUUCUJACAAGUJGUCAGUUUUAUAAACCGAAAGGGCACUG  
AGCGGACUGCUGCUGGCCUGCUACUUUUGGUJAGGUGUGAGAUJAGUCUGUGCUJAGCUCUUUUUAAAUAACAAUJAGGAAUUU  
UJAGCAUJAGAAUJACCCAGACCUUJAGUUAACAGGUUCUUUUGGAGGCUCCAGGAUUCUJAGCACCUCUJAGUGUJUUUGACC  
AAGGUJAGUUACAAGUJACUGAGUCUUJGAGAAGGUUUUJCAUGUUJGAAUJAAAGAGUUUCUJGCAUJACUGGAGGUJGGAAU  
UAAUGCUGGUCUUCUJGCCCCCCCCACCCACCCCCAGUCUCUGGAGAAGCUJAUUAAAUAAGUJAAUJGCCUJGGGGUJACUCA  
GCUGGUJAAAACAUJUCGACAGCCCUUUUJCCUJAGCCUJACUCCUUUUJCAUJGCUJCCUGCUGGAAUJGCUJCAUJGCCUUC  
AUUJAGGGGACCAGAUJGGCUGUGGGAUJAGCCACCUJGACGGGAGUCACCUJGGAUUCUJUGGGAUUAUUAAAACUGCUJGGGUUA  
UUUJAAAACUGGUJCAUJUCGUGUCCUGGGCUJAAUJAGGAGCAGAUJAAAGGUUUUCUJUUJAGAUUAUJCAUJGUCUJAGAAAU  
ACAUUUUUAUJGUCUJGUCUJAAUJACUGGGAUJUGGGGCUJACUJAAAGCAGGCACCUJCCUGGACAGUJCCAUJGAAACCCCUJ  
AAACCAUJAUUJCCUUUUGUJUCAGCGUJAGAAUJGUCUGGGAUJACUJAGGUJAUJCGGUGACAGCCUJAGGUCACUGAACUJACCCGUG  
CCUJUCUJUGGACAGAGUJACGCUJGGUJACAUJAUJGAAUCUGAGCAUJGCCCAGAGCACCUGGUCUJCCUJAGGUJAAAAGUCUJG  
AUUJACAUJCUUUUUUCUJGCAUJACAGUJAUJCCAGCCAAAGAAGUCUJAGGGGGUGGGAGGUGAGUGUJGGGUCGGUJGCGGGCUGG  
CUUJGCAAUJACAGAGAGGACAGUJACUJCCUGAAUJAGCACCAGGGUCGAGUJUAUJCAAGGAUJGAAUJAGGAACUGUUUJGUAUC  
UUGUCUGGGGAUJAGUGACAAAGUAAUJUGAGGGGCCAGUUJAAAGCACAGGCGUUCUJUGGUJAGGGGAGAAUJAGGUJAAUJAC  
AGAGGAGGGAGGGUGGUJUGUJGGUGUJGGUUUAAUUUUUUGGUGUJACUJAGCAGACUJAGAAUUUUCUJUUUGCUUUUJGGGCUJG  
UUUCUGGGCAUJGCCACUJUCGCGAGGAGCAGAAUJUCUGCAGAAAGUCAGCAUJAAUUUUJAGAUJUGAUJAAAACUJAGAGCAAG  
CUAAAAGUJGGGAGGAAGAAAGUGCUJGGUCCGAAUJUCUCCUUUAUCACUGACUJGCAUJCCAGCUGCGGUJAGGUGCUGCUGUCA  
CACCCCCACCCCCACCCCCACCCCCAGGCCAGCCGAGUJAGAAUJGCUJAUJCAUJCCCGACCUJGUAJAGAGAAGCACAGAGAGGAAGACCA  
GCGGAAACUJACCGCAUJGGAGUJAGAAAGGGGAAGUJAAUGUCACAGCCUJAGCCUGCGGGAGGACAACCAUJUGGGCAGCUCGGGAA  
GAUCUJCAAGGGGUJCCACACUJCAUUUJAGAGCCAGUJGGAAAGGCCACUJAGAUJCAUJGACCUUUJGGUJAGAAACUJAGAUJGAA  
UGGAUJAAAGGUUUUGGCUJGUCUJAAUJGGAGGUJAAACAACAACCCAAAACAAAGACGGGAUCUJUGUCUJCUJAAAACCUJCAAA  
AGCCAGGUGUGUJACUGGUGAGGUGGGGAGGGUJGCUJGAGUCCGGGAGUJCAAGAUJAGCCUJAGAAACAUJAGUUJCCAGCUGGA  
AAACAGAAGUJAAAACCUUJAAAACAAACAAAAAAAAAAAAAAAAAAAAAAAAAAAAAA

### Rffl-Inc1 Isoform – 3

AUAAUJAGCAUGGGGAGCCAAGUGUGAUCACAUUAAAAACCUAAUJAGAAAGACCGUAUAUGGAGAACAGUCCUUJAGGUUCAUCAGU  
GGUUUGCUUUCAAGCAGGAUAUUUUCUGACCGGAGUUGAAAGGGAAGAGGAGGUUCUAGGUGUUUGGGUACUAGAUCGAGGCGUG  
UAGUAGUCCACUAUGGGGAUAUGGGGAUGUJAGAGGUUUUUUUUUUCUUUUUAACCAAGAAACCAUUCAGGAAGCCACAGGCCUUC  
CACCAACUGCUAAUUUUGAAUCCUGAGGGCUUUUCUACAGCUGAAGGAGACAUUAGCAAUJAGUGGAGUCCCGCCUCCUAAUUUUC  
CAGAUAGGAGACAGACCUGUAAGAAACAUAUUUGGCUUUUGUCCAUAUUAGGCAAGCUAUUUGGCCAGUGUUUACUCCUGACACUG  
AAUGUCGCCUGGGGAACUUCAGCACUUGGAAAGCAUGGAGUJAGGCCAUAGGCCAGACCUGCGUGAGGGCGUCAGGCCUGUCACA  
UGGAUGAGGCCGUGCAGUGCUAACAGGAGCUGCGGGGUGGUGGCAGGUUUGGUUCAGGGCAGUGUGUACCACAGGACCCUUUG  
AAUUAUCUCAGACACUUUUCUGGAGAACUGUUCUUUGGGGACCAGCUGUCAGAAUUCGUCUGCAUUJAGUGGGGGGCAAGGUUU  
AAUUAUAAAACAUUUCCAACUUCUGCGGCUCUUUUUUUUUUUUUUUUUCCAGCCUUCUACUCCAGUUUUUGUUUUUGGACUCCUU  
UCCUAAUUUCAGCACCAAUUGGUJACAUUUUUUAUUGCUCAUUGCAGGGCAGAUUGUJAGCACAAGGCAUGGGAAUCCAGAAAAUGU  
CUUJAGAAUGCCGUGACUGUUUJAGUGCUUUGCCAGGCAGAUUCUACAUUUAAAUJAGUAAUJAGUUUUUCCCGUCCAGUGAGCCAGU  
UGUCAGAAACUAUGAAAAGUCACCUUUUGUCCAAGGUCUAAUUCUGAGCUGGAGAGCUGUCAGACAACCUUGGACAGGAAGUUGG  
GUUCAAGCAGAAUGUGCUUUGUCUUCACUGCAGCCUGGGUGUCUGCAGUUUGAAACUUGCUGCGGGUAAAAAGUCAAGACUUAACC  
AGAUGUGGUGGUGCACACCUGUAUUUAUUUCAGCAUCCAGGAGGCGGAGGGAGGAUAUCUUGGAGGCCAAGACUUUUAAUUAUCGA  
AAUGUUGUCCUGUGUGAGAGGGGAGGUAAUACAGUAGCCAUUCAUACACAGGAGUUUCUUUUCCAGUGCUUGACCCGUGCCUGA  
CACACAGCAGUUUJAGGGGAGAAAAACUUUUUGGUUUUCUUCUUGUCUUUUUGGCUUACAGUUUGGUAUACGCUUCUGCCUUGACA  
GGAAGUGCUUUGGUUCGAGGAACGUACCUAGUCGUUUUGCAUCUGCAGUAAUJAGGAAGCAAAGAGUAAGACCAGUAGGGCUUGGCU  
AUGACUUCAAGGCAAGCCAGAGCGCUGACUCCUUUGUGAGGCUCAUCUUCUUUAAGUUUACAGCCUCCAAAACAGCCAUCAU  
CUGGGGACACUJAGAGCCUJAGGGGACAUUUJCAUGUUCAACCACAAAACAGCUGUUGCCUCUCUGUACAUAGCAGCUUUUCUUCUG  
AGACCAGGUCAUUCUUJUGGAGUCACAGGCAUGGUGUUUUCCUGAGUUCUJACAAGUUUGCAGUUUAUAAACCGAAAGGGCACUGA  
GCGGACUGCUGCGGCCUGCUACUUUUUGGUJAGGUGUGAGAUUCAGUCUGUGCUAGCUCUUUUUUAAAAUACAAUJAGGGAUUUU  
AGCAUJAGAAUUCACAGACCUUUGAGUAACAGGUUCCUUUUUGUGAGGCUCCAGGAUUCUJAGCACCUUCUCAGUGUGUUUUGACCA  
AGGUJAGUUUACAAAGUACUGUGAGUCUUUGAGAAGGUUUUUCUUGUUUGAAUUAAGAGUUUCUUGCAUACUGGAGGUUGGAUC  
UAAUGCUGGGUCCUACUUCGCCCCCCACCCACCCCCAGUCUCUGGAGAAGCUAUUAAAUAAGUAAUUUGCCUUGGGGUCACUCA  
GCUGGUAAAACAUUCGCAGACCCUUUUUCCUAAAGCCUACUCCUUUUUJCAUUGCUUCCUGCUGUGAAUUGCUUCAUUGCCUUC  
AUUJAGGGGACCAGAUUGGCUUGGGAUJAGCCACCUJAGGAGUCACCUUGGAUUCUUGUGGAUUUAUAAAACUGCUUGGGUUA  
UUUCAAAACUGGUCAUUCUGCUGUCCUGGGCUAAUUAJAGGAGCAGUAAAAGGUUUUCUUUJAGAUUAUCAUUGUCUAAAGAAU  
ACAUUUUUAUUGUCCUUGUCCUAAUUCACUGGGAUUGUGGGCUACUAAAGCAGGCACCUCCUGAGCAAGUCCCAUGAACACCCUG  
AAACCAUCAUUUCCUUUUUGUUUCAGCGUJAGAAUUGUCUGGGAUUCUJAGGUUAUCGGUGACAGCCUAGGUACACUGAACUACCCGUG  
CCCUUCUUUGUGCAGAGUACGCUUGGUUCAGUUAUUGAACUGAGCAUGCCAGAGCACCUGUCUCCUJAGGUAAAAGUCUUG  
AUUACAUUCUUUUUCUUGCAUUCAGUUAUCCAGCCAAAGAAGUCUJAGGGGGUGGGAGGUGAGUGUUUGGGUCGGUUCUGGGCUGG  
CUUUGCAAUUCAGAGAGGACAGUACUCCUGAAAUJAGCACAGGGGUCGAGUUUAUCAAGGAUGUGAAUJAGGAACUGUUUUGUAUC  
UUGUCUGGGGAUJAGUGACAAAGUAUJUGAGGGGCCAGUUUAAGCACAGGCGUUCUUUGGUJAGGGGAGAAUJAGGUUAUAAUCAC  
AGAGGAGGGAGGGUGGUUGUJGGUGUUGGUUUUUUUUUGUGGUACUJAGCAGACUJAGAAUUUUUCUUUUGCUUUUUUGGGCUGG  
UUUCUGGGCAUGCCACUUCUGGCAGGAGCAGAAAUUCUGCAGAAAGUCAGCAUAAUUUUJAGAUUUGAUAAAACAUJAGAGCAAG  
CUAAAAGUUGGGAGGAAGAAAGUGCUUGGUCCGAAUUCUCCUUUAUCACUGACUUGCAUCCAGCUGCGGUJAGGUUCUGCUGUCA  
CACCCCCACCCCCACCCCCACCCCCAGGCCAGCCGAGUJAGAAUUCUUAUACCCCGACCUJAGGAGAGCAGAGAGGAAGACCA  
GCGGAAACUUAACGCAUUGGAGUJAGAAAGGGGAAGUAAUGUCACAGCCUJAGCCUGCGGGAGGACAACCAUUGGGCAGCUCGGGAA  
GAUCUUCAAGGGGUUCCACACUCAUUUJAGAGCCAGUGGAAAAGGCCACUJAGAUCAUUGAGCCUUUUGGUJAGGAACUJAGAUUGAAC  
UGGAUUAAGGUUUUGGCUUGUCUAAUUGGAGGUAAACAACAACCCAAAACAAAGACGGGAUCUUUGUCUUCUAAAACCUUCAA  
AGCCAGGUGUGUJAGGUGAGGUGGGGAGGGUUGCUUGAGUCCGGGAGUUCAAGAUJAGCCUCAGAAACAUAUJAGUUCAGCUGGA  
AAACAGAAGUAAAACCUUUAAAAACAACAACAAAAAAAAAAAAAAAAAAAAAAAAAA

## Rffl-Inc1 Isoform – 4

GGCCUGUCACUGGGAGUUCACAUUGUCCCGAGUCUACAGCAGAGCUUCAUUGUGGCACCUUUAUGUCACCGUGCAUUAUCUGC  
CUUUUUCUUUJAGGAGCUGUGGCCUCGCCUUUAUCCACUGAGCGGAUUUAUCCCUUGGUGUCCAGUUCUGUCCCGCACAGUAGG  
CCUUCAGUGCCAGUCACAUGAAUJAGGUGGAGCUUUGACUGACAUUUGUCCCUUUCUCCGAGAUUCUUGCCGUGAUCUCCUCU  
GCACUGACUCACAUUCUGUCUUCGUUCCCUUUUCACCCAGAUUUUGCCUGAUUCUUUCUCCAUUAACAGUCACUGUGGGU  
GUCCUGCCUGCUACUACCCUCCGCAUAUCCCAACCAUCCACGAGUCAUAUAUUAGCAUGGGAGCCAAGUGUGAUCACAUAAAA  
CCUAAUJAGAAAGACCGUAUAUGGAGAACAGUCCUUUAGGUUCAUCAGUGGUUUGCUUUCAAGCAGGAUAUUUUCUGACCGGAGUUG  
AAAGGGAAGAGGAGGUUCUJAGGUGUUUGGUACUAGAUCGAGGCGUGUAGUAGUCCACUAUGGGAUAUGGGAUGUUJAGAGGU  
UUUUUUUUCUUUUUAACCAAAGAAACCAUUCAGGAAGCCACAGGCCUUCACCAACUGCUAAUUUUUGAAUCCUGAGGGCUUUUCU  
CAGCGAAGGAGACAUJAGCAUUJAGUGGAGUCCGCCUUCUAUUUCCAGAUJAGGAGACAGACCUUAAGAAACAUAAAUGGCU  
UUGUCCAUAJAGGCAAGCUAUUGUGCCAGUGUUUACUCCUGACACUGAAUGUCGCCUGGGGAACUUCACGACUUGGAAAGCAU  
GGAGUUJAGGCAUJAGGCCAGACCGUGGAGGGGCGUCAGGCCUGUCAUGGAUJAGGCCGUGCAGUGCUACAGGAGCUGCUG  
GGGUGGUGGCAGGUUUGGUUCAGGCGAGUGUJACCACAGGACCCUUUGAAUAUCUCAGACACUUUUCUGGAGAACUGUUCUU  
GGGGACCAGCUGUCAGAAUCGUCUGCAUUUGAGUGGGGGCCAAGGUUUAAUUAUAAAACAUUCCACUUCUGCGGCUUUUU  
UUUUUUUUUUUCCAGCCUUCAUACUCCAGUUUUGUUUUGGACUUCUUUCCUAUUUCAGCACAAUUGGUACAUUUUUAUUGC  
UCCAUUGCAGGGCAGAUJAGGUAJAGCAAGGCAUGGGAUUCAGAAAUGUCUUJAGAAGUCCGUGACUGUUUAUGAGUGCUUGCCAGG  
CAGAUUUCAACUUAAAUAJAGAAUJAGAUUUUCCGUGCCAGUGAGCCAGUUGUCAGAAACUAUGAAAAGUCACCUUUUGUCCAAGG  
UCUAAUUCUGAGCUGGAGAGCUGUCAGACAACCUUGGACAGGAAGUUGGGUUAAGCAGAAUUGUCUUGUCUUCACUGCAGCCUGG  
GUGUCUGCAGUUUGAAACUUGCUGCGGGUAAAAGUCAAGACUUAACCAGAUJAGGUGGUGGUGCACCUGAAUUUAUUUCAGCAUC  
CAGGAGGCGGAGGGAGAAUUCUUGGAGGCCAAGACUUUUAUAUCGAAAUGUUGUCCUGUGUGAGAGGGAGGUAAUACAGUA  
GCCAUUCAAUACACAGGAGUUUCUUUCCAGUGCUGUGACCCUGGCCUGACACAGCAGUUJAGGGGAGAAAACUUUUGGUUU  
CUUCUUGUCUUUUGGCUUACAGUUUGUGGAUJAGCUGUCUGCCUUGACAGGAAGUUGCUUGGUUCGAGGAACGUACCUJAGUCGU  
UGCAUCUGCAGUAAUJAGGAAGCAAGAGUAAGACCAGUJAGGGCUUGGCUUJAGACUUAAGGCAAGCCCAGAGCGCUGACUCCCC  
UGUGAGGCUCCAUCUUUUUAAGUUUCACAGCCUCCAAAACAGCCAUCAUCUGGGGACACUJAGAGCCUJAGGGGACAUUUCAUGUU  
CAACCACAAAACAGCUGUUGCCUCUCUGUACAUJAGCAGCUUUUCUUCUGAGACCCAGGUCAUUCUUGGAGUCACAGGCAUGGUG  
UUUUCUUGAGUUCAAAUGUUGCAGUUUAUAAACCGAAAGGGCACUGAGCGGACUGCUGCUGGCCUGCUACUUUUGGUJAGGUGU  
GAGAUUCAGUCUGUGCUJAGCUCUUUUUAAAUAACAAUJAGGGAUUUUJAGCAUJAGAAUUCACCAGACCUUUGAGUAACAGGUUCC  
UUUUGUGAGGCCUCCAGGAUUCUJAGCACCUCUCAGUGUUUUGACCAAGGUJAGUUUACAAAGUACUGUGAGUCUUUGAGAAGG  
UUUUUCAUGUUJAGAAUJAGAGUUUCUUGCAUACUGGAGGUUGGAUCUAAUUGCUGGCCUUCUUGCCCCCCCCACCCACCCCC  
CAGUCUCUGGAGAAGCUAAUAAAUAAGUAAUUUGCCUUGGGGUCACUCAGCUGGUAACAAUCUCGACAGCCCCUUUUCCUJAGCC  
CUACUCCUUUUUCAUJAGCUUCCUGCUGGAAUUGCUUJAGUCCUJAGUUJAGGGGACCAGAUJAGGCUUGGGAUJAGCCACCUGC  
AGGGAGUCACCUJAGGAUCUUUGUGGAUUUAUAAAACUGCUUGGGUUAUUUCAAACUGGUCCAUCUGCUGUCCUGGGCUAUA  
UUJAGGAGCAGUAAAGGUUUUCUUUJAGAUUAUCAUUGUCUJAGAAUJAGAUUUUUUAUUGUCCUUGUCCUAAUUCACUGGGAUJ  
UGGGCUACUAAAGCAGGACCCUCCGAGCAAGUCCAUJAGAACCCCCUJAGAAACCAUJAGUUCUUUUGUUUCAGCGUJAGAAUJAGC  
UGGGAAUACUJAGGUJAGCGUGACAGCCUJAGGUCACUGAACUACCCGUGCCUUCUUUUGGCACAGAUJAGCUGGUUJAGUUA  
UJAGAACUGAGAUJAGCCAGAGCACCUGUGCUUCCUJAGGUAAAAGUCUJAGAUJAGAUUCUUUUUCUJAGCAUUCAGUJAGCCAGCAA  
AGAAGUCUJAGGGGUGGGGAGGUGAGUUGGGUCGGUGCUGGGCUGGCCUJAGCAAUCAGAGAGGACAGUACUUCUGAAAUJAG  
CACCAGGGUCGAGUUAUCAAGGAUGGAAUJAGGAACUGUUUUGUAUCUJAGCUGGGGAUJAGUJAGCAAAGUAAUJAGUGAGGGCC  
AGUUUAAGCACAGGCGUUCUUUGGUJAGGGGAGAAUJAGGUUAUAAUCACAGAGGAGGGAGGGUUGUUGGUGUUGGUUUUU  
UUUGUGGUACUJAGCAGACUJAGAAUUUUUCUUUUGCUUUUUGGGCUGGUUCUGGGCAUGCCACUUCUGGCAGGAGCAGAAUUUC  
UGCAGAAAGUCAGCAUAAUUUUJAGAUUUJAGUAAAACUJAGAGCAAGCUAAAAGUJAGGGAGGAAGAAAGUGCUUGGUCCGAAUU  
CUCCUUUAUCACUGACUUGCAUCCAGCUGCGGUAUGGUGCUGCUGACACCCCCACCCCCACCCCCACCCCCAGGCCAGCCGAGG  
AAUGCUAUUCUACCCGACCUGGUJAGAGAAGCACAGAGAGGAAGACCAGCGGAACUUAACGCAUJAGGAGUJAGAAAGGGGAAGUA  
UGUCACAGCCUJAGCCUGCGGGAGGACAACCAUGUGGGCAGCUCGGGAAGAUUCUUAAGGGGUUCCACACUAAUUJAGAGCCAGUG  
GAAAAGGCCACUJAGAUUJAGACCUUUUGGUJAGAAACUJAGAUJAGAACUGGAUJAGAAAGGUUUUGGCUUGUCUAAUGGAGGUAA  
ACAACAACCCAAAACAAAGACGGGAUCUUUGUCUUCUAAAACCUUCAAAGCCAGGUGUGUAUCUGGUGAGGUGGGAGGGUUGCU  
UGAGUCCGGGAGUUAAGAUJAGCCUCAGAAACUJAGUUUCCAGCUGGAAAACAGAAUAAAACCUUUAAAACAAACAAAAA  
AAAAAAAAAAAAAAAAAAAA

Table S1

[Click here to Download Table S1](#)
